# Supplementary material for: Environmental Signals Act as a Driving Force for Metabolic and Defense Responses in the Antarctic Plant Colobanthus quitensis
Source: MDPI journal article supplement (doi:10.3390/plants11223176), 2022-11-21
Supplement: s1 [file s1]

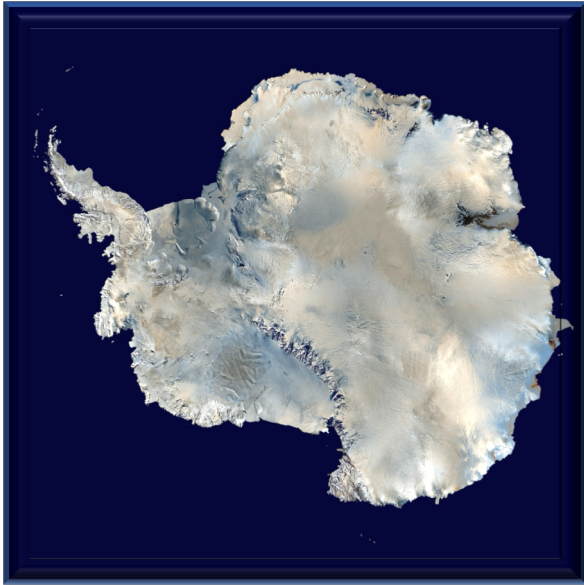

(a)

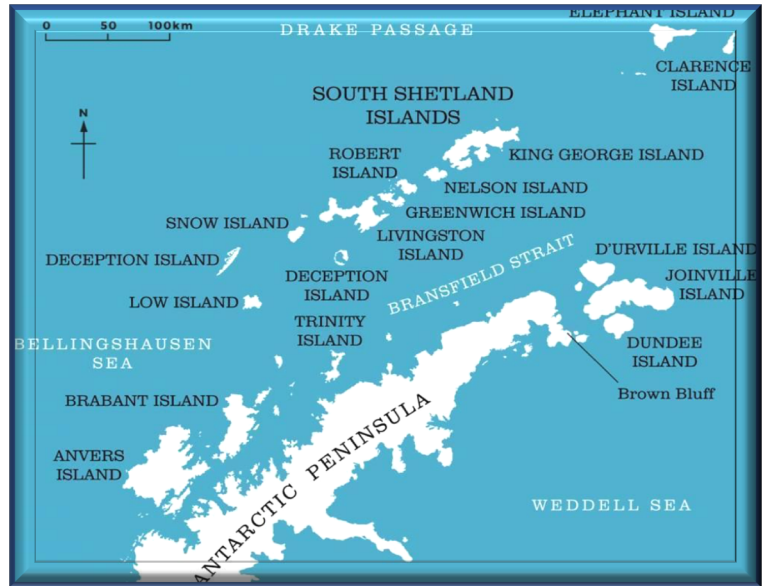

(b)

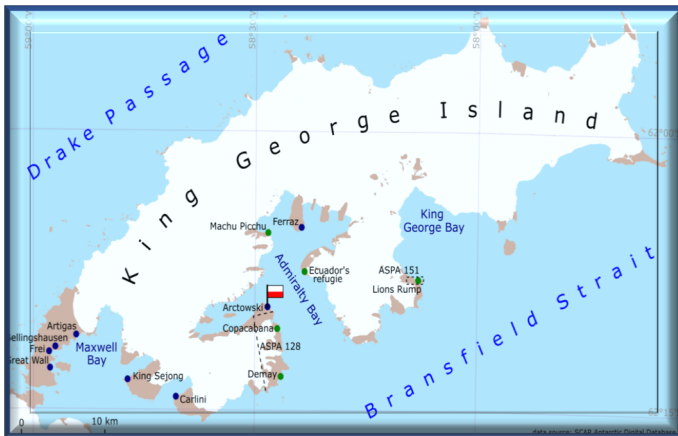

(c)

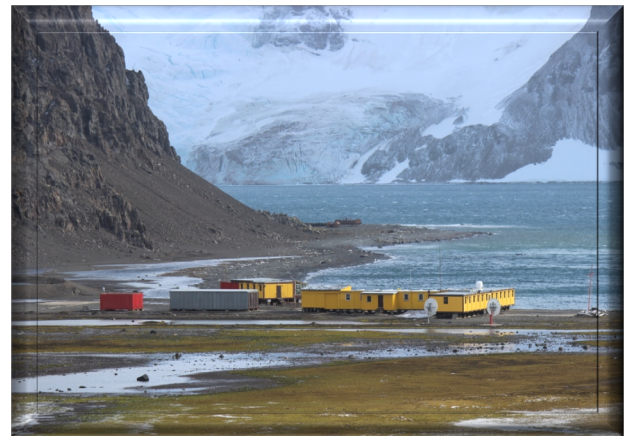

(d)

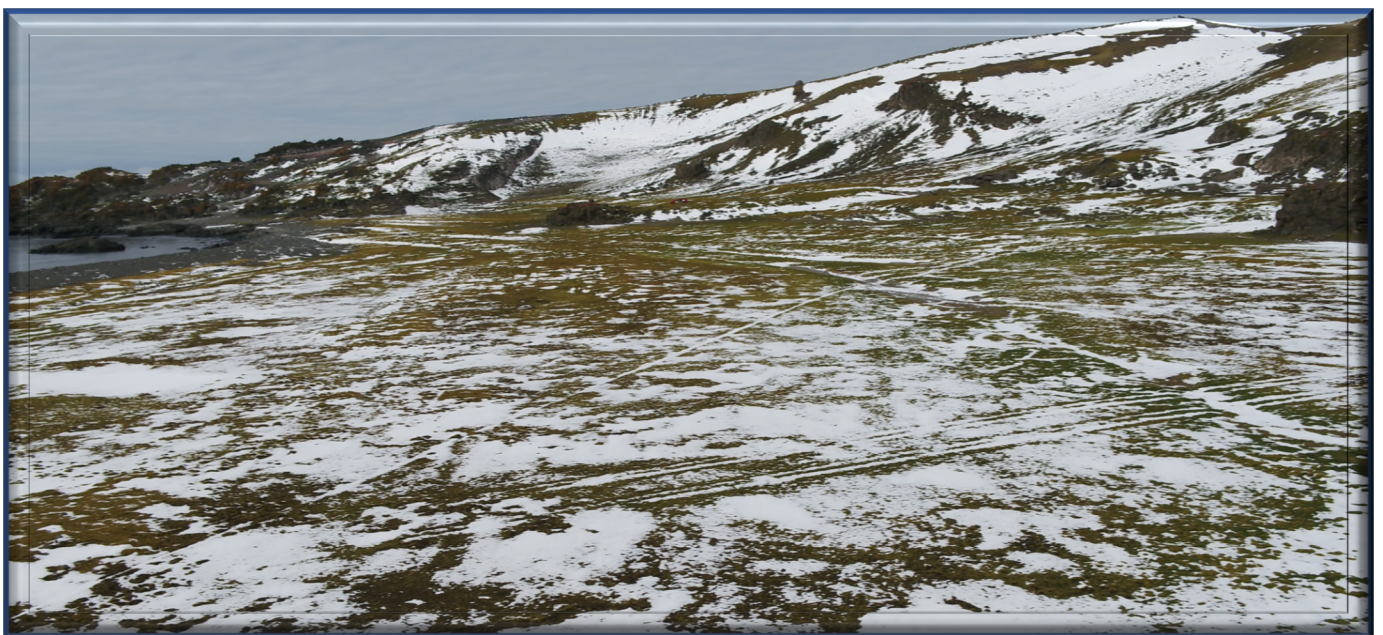

(e)

**Figure S1.** Sampling sites.

Panel (a) The image was taken from:

[https://www.coolantarctica.com/gallery/scenic/views\\_of\\_antarctica.php](https://www.coolantarctica.com/gallery/scenic/views_of_antarctica.php)

(Unlabeled free use relief map of Antarctica)

Panel (b) The image was taken from:

<https://www.cruisemapper.com/ports/antarctic-peninsula-port-982>

Map credit: Swoop Antarctica (<https://www.swoop-antarctica.com/>)

Panel (c) The image was taken from the Arctowski Polish Antarctic Station website (<https://arctowski.aq/en/about-station/>). The source of the figure is the SCAR Antarctic Digital

Database (ADD) (<https://www.scar.org/resources/antarctic-digital-database/>). ADD is a free database in which the data are made available under the Creative Commons Attribution 4.0 International (CC BY 4.0) license.

Panels (d) and (e)

The images are from the personal archive of one of the authors.
